# Supplementary material for: Synthesis, structure, magnetic properties and DNA cleavage of binuclear Cu(ii) Schiff-base complexes
Source: Royal Society of Chemistry journal article supplement (doi:10.1039/b819052f), 2009-01-01
Supplement: b819052f.pdf [file b819052f.pdf]

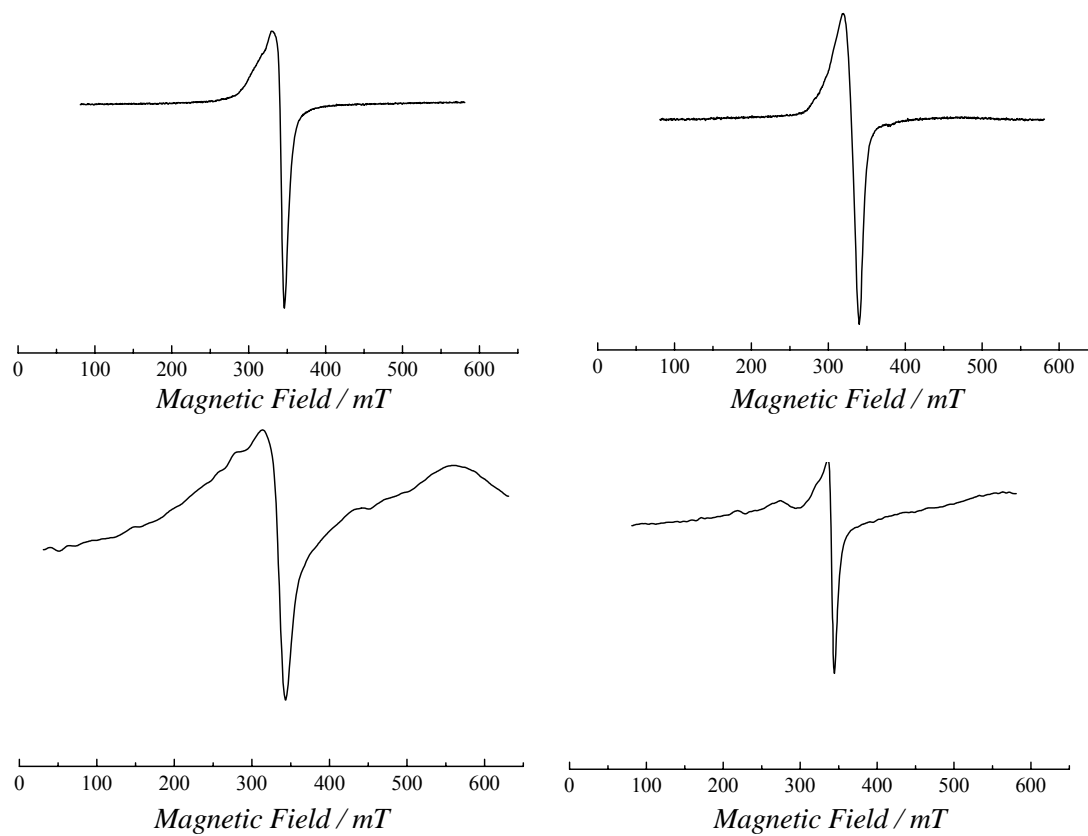

**Fig. S1** ESR spectra for complexes **1**, **3**, **4** and **5**.

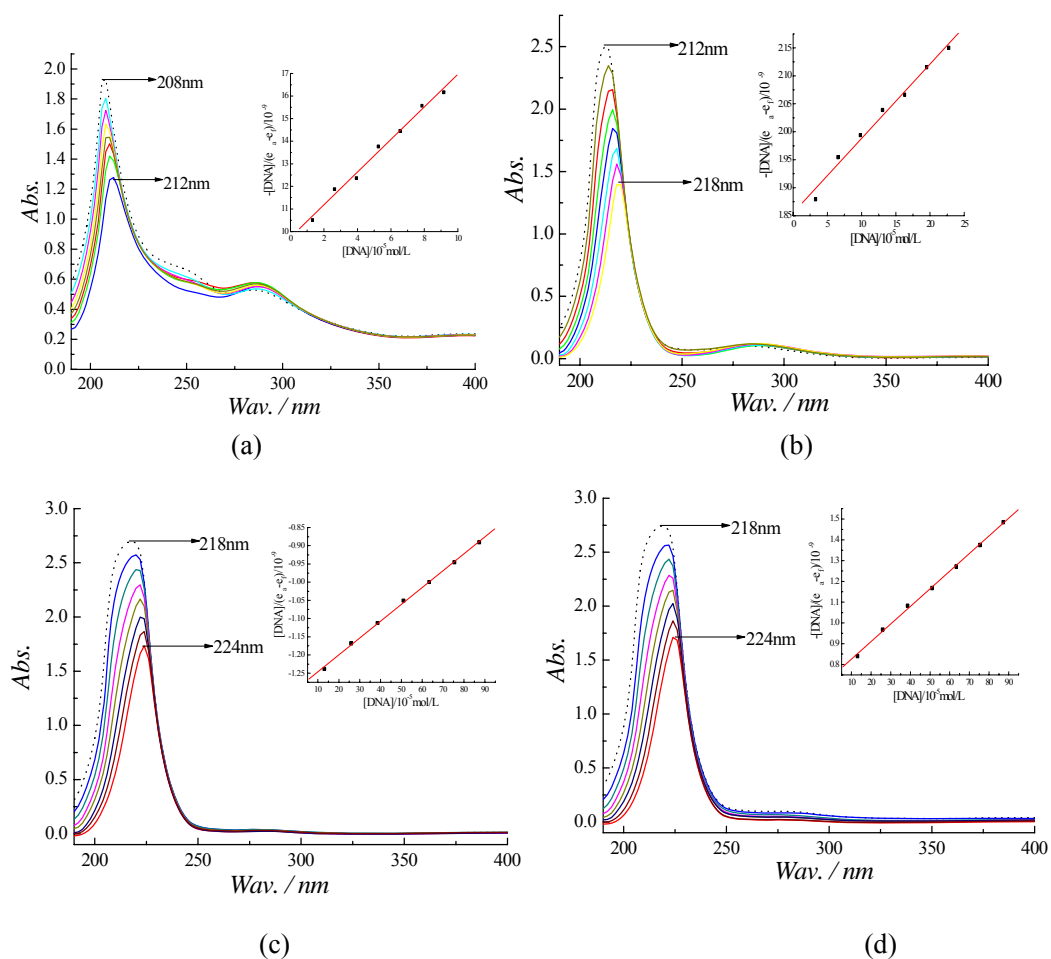

**Fig. S2** Absorption spectra of complexes **1** (a) ( $1 \times 10^{-4}$  M), **3** (b) ( $1 \times 10^{-5}$  M), **4** (c) ( $1 \times 10^{-6}$  M) and **5** (d) ( $1 \times 10^{-6}$  M) in the absence (dashed line) and presence (solid line) of increasing amounts of CT-DNA at room temperature in 50 mmol Tris-HCl/18 mmol NaCl buffer (pH = 7.2). The dashed lines indicate the free complexes.

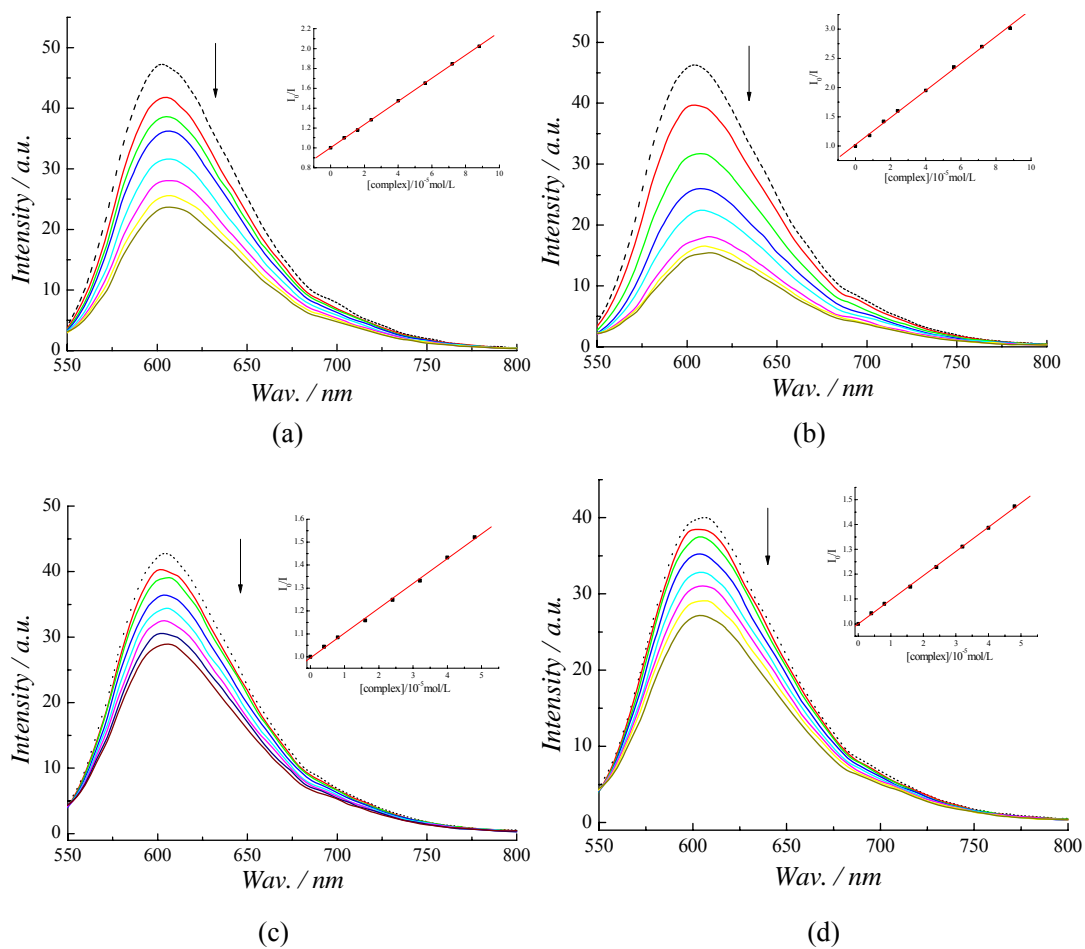

**Fig. S3** Fluorescence quenching curves and plots of  $I_0/I$  vs.  $[\text{complex}]$  of EB bound to DNA by Complexes **1** (a), **3** (b), **4** (c) and **5** (d).  $\lambda_{\text{ex}} = 510 \text{ nm}$ .

**Table S1.** The DNA mass fraction (%) of agarose gel electrophoresis of pBR322 plasmid DNA treated with 200  $\mu$ M complexes in the absence and presence of hydrogen peroxide

| Complex  | Form I | Form II | Form I (H <sub>2</sub> O <sub>2</sub> ) | Form II (H <sub>2</sub> O <sub>2</sub> ) | Form III (H <sub>2</sub> O <sub>2</sub> ) |
|----------|--------|---------|-----------------------------------------|------------------------------------------|-------------------------------------------|
| <b>1</b> | 60.67  | 39.33   | 36.65                                   | 63.35                                    | 0                                         |
| <b>3</b> | 41.35  | 58.65   | 35.61                                   | 64.39                                    | 0                                         |
| <b>4</b> | 58.70  | 41.30   | 41.23                                   | 58.77                                    | 0                                         |
| <b>5</b> | 59.72  | 40.28   | 18.60                                   | 56.59                                    | 24.81                                     |

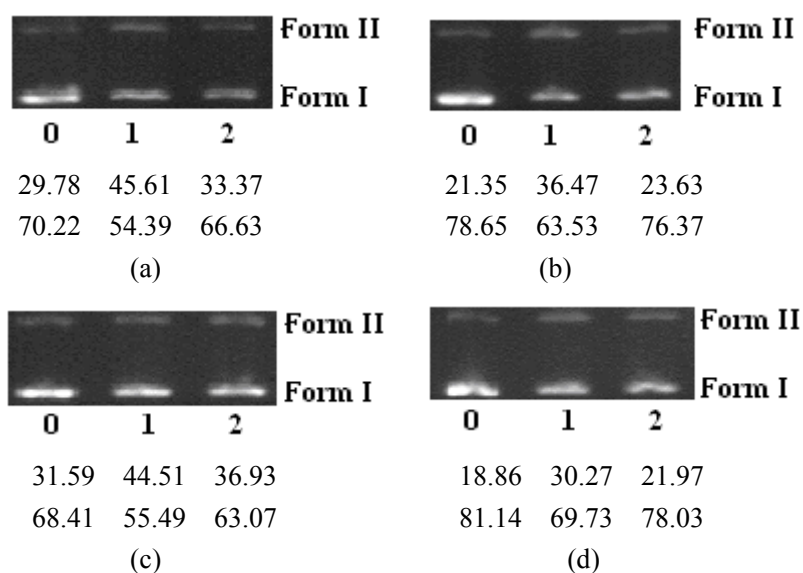

**Fig. S4** Cleavage of pBR322 DNA (0.1  $\mu$ g /  $\mu$ L) at room temperature for 3 h. (a) lane 0: DNA control; lane 1: DNA + **1** in air; lane 2: DNA + **1** in N<sub>2</sub> atmosphere; (b) lane 0: DNA control; lane 1: DNA + **3** in air; lane 2: DNA + **3** in N<sub>2</sub> atmosphere; (c) lane 0: DNA control; lane 1: DNA + **4** in air; lane 2: DNA + **4** in N<sub>2</sub> atmosphere; (d) lane 0: DNA control; lane 1: DNA + **5** in air; lane 2: DNA + **5** in N<sub>2</sub> atmosphere.
